# Supplementary material for: The optimized carbapenem inactivation method for objective and accurate detection of carbapenemase-producing Acinetobacter baumannii
Source: Front Microbiol. 2023 Jul 13;14:1185450. doi: 10.3389/fmicb.2023.1185450 (PMC10372451; doi:10.3389/fmicb.2023.1185450)
Supplement: SUPPLEMENTARY TABLE S1 — Information of strains used in this study. [file Table_1.XLSX]

## Sheet: Sheet1
Bacteria	MIC (μg/ml)				Carbapenemases															Phenotypic investigations
	IPM		MEM		OXA-51-like			KPC			TEM			SHV			OXA-23-like			Hodge	mCIM		Adjusted mCIM		sCIM		oCIM
	VITEK2	Etest	VITEK2	Etest	Existence	copies/μl	Log10 copies/μl	Existence	copies/μl	Log10 copies/μl	Existence	copies/μl	Log10 copies/μl	Existence	copies/μl	Log10 copies/μl	Existence	copies/μl	Log10 copies/μl		Inhibition zones (mm)	Determination	Inhibition zones (mm)	Determination	Inhibition zones (mm)	Determination	Inhibition zones (mm)	Determination
1	>16	12	>4	8	+	1216	3.08493				+	20117.8	4.30358				+	16478.8	4.21693	-	19	N	21	N	22	I	6	P
2	<1	16	>4	16	+	1582	3.19921				+	32390.7	4.51042				+	54489.3	4.73631	+	23	N	21	N	22	I	13 with colonies of E. coli	P
3	>16	8	>4	4	+	3370	3.52763				+	17090.4	4.23275				+	18580.1	4.26905	-	18	I	17	I	22	I	6	P
4	>16	8	>4	8	+	1410	3.14922				+	8378.32	3.92316				+	10205.7	4.00884	-	20	N	16	I	22	I	6	P
5	2	8	>4	4	+	7927	3.89911				+	6882.58	3.83775				+	7221.31	3.85862	±	18	I	6	P	19	P	6	P
6	<1	0.125	<0.25	0.125	+	573	2.75815													-	20 with colonies of E. coli	I	24	N	23	I	26	N
7	>16	16	>4	12	+	3355	3.52569				+	4757.54	3.67738				+	8739.27	3.94147	-	17	I	13	P	21	I	6	P
8	>16	8	>4	6	+	407.647	2.61028				+	5217.47	3.71746				+	13836.9	4.14104	±	18 with colonies of E. coli	P	18	I	18	P	6	P
9	>16	12	>4	4	+	1356	3.13226				+	22459.7	4.3514							-	18	I	12 with colonies of E. coli	P	20	P	6	P
10	>16	>32	>4	>32	+	15966	4.2032				+	2847.64	3.45449				+	79235	4.89892	-	19	N	23	N	24	I	6	P
11	>16	>32	>4	6	+	306.375	2.48625				+	34167.1	4.53361				+	33469.9	4.52465	-	21 with colonies of E. coli	I	13 with colonies of E. coli	P	25	I	6	P
12	>16	16	>4	>32	+	3551	3.55035	+	110615	5.04381	+	28295.6	4.45172	+	36049.6	4.5569				+	6	P	6	P	15	P	6	P
13	>16	8	>4	6	+	9031.63	3.95577				+	48633.3	4.68693				+	30901.1	4.48997	-	21 with colonies of E. coli	I	18	I	20	P	6	P
14	>16	4	>4	4	+	9392.97	3.9728				+	86276.3	4.93589							-	21 with colonies of E. coli	I	22	N	22	I	14 with colonies of E. coli	P
15	>16	12	>4	8	+	616.382	2.78985										+	60815.4	4.78401	-	25 with colonies of E. coli	I	18	I	22	I	6	P
16	>16	12	>4	8	+	682.185	2.8339				+	37965.1	4.57938				+	63425.9	4.80227	-	20 with colonies of E. coli	I	17	I	23	I	6	P
17	>16	8	>4	6	+	2237	3.34967				+	24007.5	4.38035				+	23313.3	4.3676	-	20 with colonies of E. coli	I	17	I	15	P	6	P
18	2	10	>4	6	+	2768.35	3.44222				+	37184.9	4.57037				+	33192.4	4.52104	-	18 with colonies of E. coli	P	6	P	22	I	6	P
19	>16	8	>4	8	+	413.285	2.61625				+	30060.9	4.478				+	22380.9	4.34988	-	20	N	16	I	23	I	6	P
20	>16	10	>4	8	+	7207.58	3.85779										+	59231.6	4.77255	-	21 with colonies of E. coli	I	17	I	21	I	6	P
21	<1	0.125	<0.25	0.125	+	801	2.90363													-	23 with colonies of E. coli	I	23	N	22	I	22	N
22	<1	0.125	<0.25	0.125	+	801	2.90363													-	23 with colonies of E. coli	I	23	N	22	I	22	N
23	>16	8	>4	6	+	869.353	2.9392										+	40556.4	4.60806	-	21 with colonies of E. coli	I	6	P	21	I	6	P
24	>16	>32	>4	>32	+	1394.11	3.1443				+	49700.2	4.69636				+	69320.9	4.84086	-	20 with colonies of E. coli	I	12 with colonies of E. coli	P	20	I	6	P
25	>16	>32	>4	>32	+	7732	3.88829				+	185142	5.2675				+	65339	4.81517	±	19	N	6	P	20	I	6	P
26	<1	0.064	<0.25	0.064	+	232	2.36549													-	22	N	21	N	23	I	25	N
27	>16	8	>4	4	+	4418.08	3.64523				+	53328.9	4.72696				+	23920.6	4.37877	-	20	N	18	I	19	P	6	P
28	>16	16	>4	8	+	882.735	2.94583				+	92802.7	4.96756				+	5071.41	3.70513	-	18	I	21	N	24	I	27 with colonies of E. coli	I
29	>16	8	>4	6	+	2454.06	3.38989				+	91648.2	4.96212				+	33655.4	4.52705	-	20	N	20	N	22	I	6	P
30	>16	12	>4	6	+	17962.3	4.25436				+	87069.7	4.93987				+	28680	4.45758	-	20 with colonies of E. coli	I	18	I	21	I	18 with colonies of E. coli	P
31	>16	16	>4	8	+	3750.54	3.57409				+	41665.9	4.61978				+	19709.9	4.29468	-	20 with colonies of E. coli	I	16	I	20	P	6	P
32	>16	8	>4	6	+	1976.49	3.29589				+	103343	5.01428				+	22243.6	4.34721	-	20	N	18	I	17	P	6	P
33	>16	4	>4	4	+	1530	3.18469				+	46476.2	4.66723							-	21 with colonies of E. coli	I	21	N	22	I	6	P
34	>16	16	>4	4	+	846.821	2.92779				+	191716	5.28266				+	16734.3	4.22361	-	21	N	18	I	20	P	6	P
35	<1	0.125	<0.25	0.125	+	773	2.88818													-	20	N	22	N	23	I	23	N
36	>16	8	>4	4	+	1311.27	3.11769				+	601808	5.77946				+	19882.4	4.29847	-	23	N	15	P	20	P	6	P
37	>16	8	>4	6	+	1542	3.18809				+	95004.9	4.97775				+	6089.98	3.78462	-	21	N	12	P	19	P	6	P
38	>16	6	>4	6	+	3912.82	3.59249				+	179436	5.25391				+	5553.05	3.74453	-	17	I	17	I	18	P	6	P
39	8	8	>4	8	+	13027.5	4.11486				+	226738	5.35552				+	16201.6	4.20956	-	20	N	6	P	20	P	6	P
40	>16	8	>4	8	+	488.363	2.68874				+	14618.1	4.16489				+	3929.1	3.59429	-	21	N	10	P	21	I	6	P
41	>16	16	>4	8	+	1179.97	3.07187				+	9875.93	3.99458				+	7499.96	3.87506	-	21	N	14	P	22	I	6	P
42	>16	>32	>4	8	+	10773.8	4.03237				+	15370.4	4.18669				+	23431.4	4.3698	-	21	N	6	P	18	P	6	P
43	>16	12	>4	8	+	1581.1	3.19896				+	23502.5	4.37111				+	23825.3	4.37704	-	21	N	17	I	17	P	6	P
44	>16	8	>4	6	+	9484.9	3.97703				+	37487.5	4.57389				+	17573.9	4.24487	-	20	N	18	I	18	P	6	P
45	>16	12	>4	8	+	1426.24	3.15419				+	37420.8	4.57311				+	29984.9	4.4769	-	20	N	14	I	18	P	6	P
46	>16	10	>4	6	+	3008.51	3.47835				+	55487.6	4.7442				+	26307.6	4.42008	-	23	N	6	P	17	P	6	P
47	>16	8	>4	6	+	11617.4	4.06511				+	113561	5.05523				+	38344.7	4.5837	-	20	N	6	P	18	P	6	P
48	>16	12	>4	8	+	11004	4.04155				+	35244.3	4.54709				+	36175.5	4.55841	-	19	N	16	I	19	P	6	P
49	<1	>32	>4	>32	+	7670.78	3.88484				+	42156.6	4.62487				+	22702.2	4.35607	-	21	N	13	P	20	P	6	P
50	>16	8	>4	8	+	4192.15	3.62244				+	24980.7	4.3976				+	5843.4	3.76667	-	19	N	8	P	18	P	6	P
51	>16	8	>4	6	+	647.874	2.81149				+	85211.4	4.9305				+	7232.82	3.85931	-	22	N	9 with colonies of E. coli	P	21	I	6	P
52	>16	8	>4	6	+	3742.36	3.57315				+	39848.1	4.60041				+	12444.7	4.09499	-	19	N	6	P	22	I	6	P
53	2	16	>4	4	+	3224.68	3.50849				+	101678	5.00723				+	46232.1	4.66494	-	24	N	15	P	22	I	6	P
54	<1	8	<0.25	6	+	2157.69	3.33399				+	44600	4.64933				+	22679.3	4.35563	-	23	N	6	P	21	I	6	P
55	>16	8	>4	6	+	1362.86	3.13445				+	192302	5.28398				+	44267	4.64608	+	24	N	11 with colonies of E. coli	P	23	I	6	P
56	<1	16	>4	16	+	1272.44	3.10464				+	625617	5.79631				+	77809.3	4.89103	-	22	N	10 with colonies of E. coli	P	21	I	6	P
57	>16	8	>4	8	+	2055.18	3.31285				+	330893	5.51969				+	45744.5	4.66034	-	22	N	6	P	20	P	6	P
58	>16	12	>4	8	+	1665.35	3.22151				+	93227.7	4.96954				+	35414.8	4.54919	+	24	N	6	P	23	I	6	P
59	>16	6	>4	4	+	1110.72	3.04561				+	179611	5.25433				+	52897.4	4.72343	-	24	N	6	P	20	P	6	P
60	>16	8	>4	6	+	1458.73	3.16398				+	228659	5.35919				+	46855.7	4.67076	+	24	N	6	P	20	P	6	P
61	>16	12	>4	8	+	1351.13	3.1307				+	13531.3	4.13134				+	35623.1	4.55173	-	25	N	13	P	19	P	6	P
62	>16	8	>4	8	+	1268.66	3.10335										+	25031.7	4.39849	-	23	N	6	P	20	P	6	P
63	>16	8	>4	8	+	1668.71	3.22238				+	9029.75	3.95568				+	32720.5	4.51482	-	21	N	17	I	22	I	6	P
64	<1	16	>4	12	+	1827.94	3.26196				+	14248.9	4.15378				+	44691.8	4.65023	+	6	P	6	P	11	P	6	P
65	>16	6	>4	8	+	4089.86	3.61171				+	22078.5	4.34397				+	14870.9	4.17234	-	18	I	11 with colonies of E. coli	P	19	P	6	P
66	>16	6	>4	4	+	2598.69	3.41475				+	35734.3	4.55309							-	15	P	9 with colonies of E. coli	P	22	I	6	P
67	>16	16	>4	12	+	477.927	2.67936				+	35668.1	4.55228				+	39262.2	4.59397	-	20	N	6	P	22	I	6	P
68	>16	8	>4	4	+	5451.52	3.73652				+	53548	4.72874				+	20758.8	4.3172	-	22	N	11 with colonies of E. coli	P	19	P	6	P
69	>16	8	>4	6	+	11064.9	4.04395				+	112062	5.04946				+	16254.1	4.21096	+	23	N	14	P	19	P	6	P
70	>16	8	>4	4	+	929.018	2.96802				+	33531.2	4.52545				+	19603.3	4.29233	-	22	N	9	P	20	P	6	P
71	>16	16	>4	8	+	15913.3	4.20176				+	40332.8	4.60566				+	13779.2	4.13923	-	22	N	14	P	21	I	6	P
72	>16	8	>4	6	+	8402.07	3.92439				+	23512.3	4.3713				+	40938	4.61213	-	20	N	13	P	20	P	6	P
73	>16	8	>4	4	+	1504.66	3.17744				+	45217.2	4.6553				+	16359.1	4.21376	-	23	N	17	I	21	I	6	P
74	>16	16	>4	8	+	1526	3.18355				+	77584.1	4.88977				+	24981.3	4.39762	-	21	N	12	P	20	P	6	P
75	>16	4	>4	4	+	1374.02	3.13799				+	88305.4	4.94599				+	39634.1	4.59807	-	22	N	18	I	23	I	6	P
76	>16	12	>4	8	+	8420.64	3.92534				+	47493.8	4.67664				+	32255.9	4.50861	-	23	N	16	I	20	P	6	P
77	>16	8	>4	6	+	1225.9	3.08846				+	163685	5.21401				+	20175.2	4.30482	-	19	N	7	P	20	P	6	P
78	>16	8	>4	6	+	1230.33	3.09002				+	42068.4	4.62396				+	20213	4.30563	-	22	N	17	I	19	P	6	P
79	>16	8	>4	4	+	1700	3.23045				+	24005.3	4.38031	+	740.598	2.86958				-	22	N	23	N	18	P	25	N
80	>16	4	>4	4	+	4141	3.61711							+	1158.04	3.06372				-	22	N	25	N	22	I	26	N
81	>16	4	>4	4	+	1796	3.25431				+	10102.6	4.00443	+	1002.11	3.00091				-	16	I	24	N	22	I	22	N
82	>16	>32	>4	>32	+	3993.29	3.60133				+	57562.7	4.76014				+	61874.9	4.79151	-	21	N	6	P	14	P	6	P
83	>16	4	>4	4	+	3410.69	3.53284				+	97974.3	4.99111				+	28779.1	4.45908	-	29	N	17	I	22	I	6	P
84	>16	8	>4	4	+	8650	3.93702				+	74958.6	4.87482							+	6	P	6	P	6	P	6	P
85	>16	6	>4	4	+	15361.7	4.18644				+	75718.1	4.8792							-	6	P	6	P	19	P	6	P
86	>16	8	>4	4	+	11596.9	4.06434				+	95009.6	4.97777				+	34897.8	4.5428	-	19 with colonies of E. coli	I	13	P	22	I	6	P
87	>16	8	>4	8	+	4513	3.65447				+	1699.61	3.23035	+	5392.61	3.7318	+	1662.55	3.22078	-	23	N	13	P	18	P	26	N
88	>16	4	>4	4	+	936	2.97128				+	7213.45	3.85814	+	2134.23	3.32924	+	6409.35	3.80681	-	23	N	18	I	22	I	15	P
89	>16	8	>16	4	+	2909	3.46374							+	828.167	2.91812				-	20	N	19	N	20	P	25	N
90	>16	6	>4	4	+	1291.5	3.1111				+	67654.8	4.8303				+	27808.6	4.44418	-	21	N	15	P	22	I	6	P
P, positive; I, Indeterminate; N, Negative.
