# Supplementary material for: The optimized carbapenem inactivation method for objective and accurate detection of carbapenemase-producing Acinetobacter baumannii
Source: Front Microbiol. 2023 Jul 13;14:1185450. doi: 10.3389/fmicb.2023.1185450 (PMC10372451; doi:10.3389/fmicb.2023.1185450)
Supplement: SUPPLEMENTARY TABLE S2 — Determination of oCIM conditions. [file Table_2.XLSX]

## Sheet: Sheet1
Bacteria	Carbapenemases expressions			Inhibiton zones of oCIM (mm)
				200 μl						400 μl						2 ml
	KPC Log10 copies/μl	OXA-23-like Log10 copies/μl	OXA-51-like Log10 copies/μl	2 h		4 h		6 h		2 h		4 h		6 h		2 h		4 h		6h
				OD600=6	OD600=8	OD600=6	OD600=8	OD600=6	OD600=8	OD600=6	OD600=8	OD600=6	OD600=8	OD600=6	OD600=8	OD600=6	OD600=8	OD600=6	OD600=8	OD600=6	OD600=8
1	0	4.2169	3.0849	17 with colonies of E. coli	12 with colonies of E. coli	6	6	6	6	19 with colonies of E. coli	15 with colonies of E. coli	13 with colonies of E. coli	6	6	6	25	25	19	19	6	6
2	0	4.7363	3.1992	21 with colonies of E. coli	20 with colonies of E. coli	17	13	15	6	20 with colonies of E. coli	19 with colonies of E. coli	19 with colonies of E. coli	16	13	11	28	25	18	20	15	13
3	0	4.2690	3.5276	16	13	6	6	6	6	19	18	6	6	6	6	25	25	19	18	6	6
5	0	3.8586	3.8991	10	6	6	6	6	6	16	16	6	6	6	6	26	23	20	15	6	6
12	5.0438	0	3.5504	6	6	6	6	6	6	6	6	6	6	6	6	10	6	6	6	6	6
14	0	0	3.9728	25	21	17	14	6	6	26	23	20	16	6	6	23	22	19	16	6	6
15	0	4.7840	2.7899	16 with colonies of E. coli	13 with colonies of E. coli	6	6	6	6	22	21	6	6	6	6	24	20	14	17	6	6
80	0	0	3.6171	29	29	28	26	26	23	29	29	26	25	25	23	29	27	28	27	26	24
81	0	0	3.2543	25	25	24	22	24	21	28	26	26	24	24	25	28	25	26	22	26	21
88	0	3.8068	2.9713	24	23	21	15	23	22	27	26	23	22	22	21	26	25	24	23	23	22
